# Supplementary material for: Relationship between metabolic syndrome and thyroid nodules in healthy Koreans
Source: PubMed Central journal article supplement — Korean J Intern Med. 2015 Dec 28;31(1):98–105. doi: 10.3904/kjim.2016.31.1.98 (PMC4712440; doi:10.3904/kjim.2016.31.1.98), 2015-12-28
Supplement: kjim-31-1-98-supple1.pdf [file kjim-31-1-98-supple1.pdf]

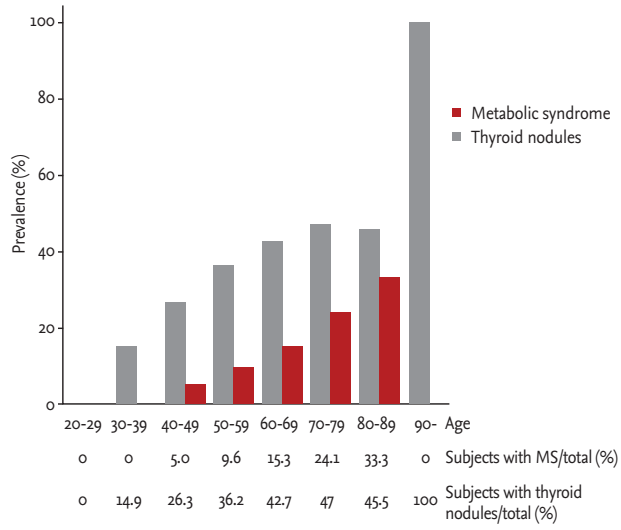

**Supplementary Figure 1.** Association between age and the prevalence of metabolic syndrome (MS) and thyroid nodules.
